# Supplementary material
Source: Research Square preprint supplement (doi:10.21203/rs.3.rs-9538201/v1)
Supplement: Supplementary file 1 [file 072f294f31f69f4855e2ab5d.docx]

Supplementary document 2:

**Investigation of the knowledge of cancer comorbidity management (For physicians from community hospitals)**

Thank you for your participation in the questionnaire survey of this project. This questionnaire is only a survey of your understanding and opinions about cancer comorbidity management, does not involve personal privacy items. The researchers of this project will adhere to the principle of confidentiality, and no sensitive data will be leaked.

Please choose whether to agree with us to collect relevant data

○ Agree

○ Disagree (Please skip to the end of the questionnaire and submit your answer paper)

1. Your gender:

| ○ Male |
| --- |
| ○ Female |

1. Your age (years):

| ○A. ≤ 29 |
| --- |
| ○B. 30-39 |
| ○C. 40-49 |
| ○D. 50-59 |
| ○E. ≥ 60 |

1. Your educational background:

| ○A. Junior college |
| --- |
| ○B. Bachelor |
| ○C. Master or above |

1. Years of working in community hospitals:

| ○A. ≤ 3 years |
| --- |
| ○B. 4-5 years |
| ○C. 6-10 years |
| ○D. > 10 years |

5. Your department in community hospitals:

| ○A. Internal Medicine |
| --- |
| ○B. Surgery |
| ○C. Oncology |
| ○D. Obstetrics and Gynecology |
| ○E. Pediatrics |
| ○F. Traditional Chinese Medicine |
| ○G. General Practice |
| ○H. Others (please fill in) _________________ |

6. Your professional titles:

| ○A. Resident physicians |
| --- |
| ○B. Attending physicians |
| ○C. Deputy chief physicians |
| ○D. Chief physicians |

1. Whether cancer patients were included in chronic disease management in your community?

| ○A. Yes (Please skip to Q8) |
| --- |
| ○B. No (Please skip to Q9) |

1. Which kind of chronic disease management models for cancer patients were used in your community?

| ○A. Follow up (Collection of information on cancer patients, including follow-up by telephone about the disease control situation) |
| --- |
| ○B. (A) + Clinical indicator monitoring (including necessary clinical indicator testing and imaging examination) |
| ○C. (A) + (B) + intervention (provide clinical treatment based on evaluation results) |
|  |
| 1. Are you familiar with ‘cancer comorbidity’? |  |
| ○A. Very familiar |
| ○B. Partially familiar |
| ○C. Not familiar |
|  |

10. What do you think are the common comorbidities of cancer? (multiple choice)

| □A. Cardiovascular and cerebrovascular diseases |  |
| --- | --- |
| □B. Metabolic diseases, such as diabetes mellitus, dyslipidemia, and gout |  |
| □C. Chronic obstructive pulmonary disease |  |
| □D. Mental and mental illness |  |
| □E. Bone and joint diseases |  |
| □F. Digestive system diseases |  |

11. Are you familiar with the common tools for comorbidity assessment?

| ○A. Very familiar |
| --- |
| ○B. Partially familiar |
| ○C. Not familiar |
|  |

12. When you encounter elderly patients with cancer comorbidity, how often would you conduct a comprehensive evaluation?

| | ○A. Often | | --- | | ○B. Occasionally | | ○C. Never | |
| --- | --- | --- | --- |
|  |

13. Are you familiar with the impact of comorbidity on cancer treatment?

| ○A. Very familiar |
| --- |
| ○B. Partially familiar |
| ○C. Not familiar |

14. Are you familiar with the impact of cancer on comorbidity treatment?

| ○A. Very familiar |
| --- |
| ○B. Partially familiar |
| ○C. Not familiar |

15. Do you think the treatment of cancer comorbidity is important?

| ○A. Very important |
| --- |
| ○B. Important |
| ○C. Not important |

1. What do you think are the main difficulties in managing cancer patients? (multiple choice)

| □A. Lack of specialized knowledge in oncology |  |
| --- | --- |
| □B. Difficulty in keeping up the pace due to rapid renewal of cancer drugs |  |
| □C. Lack of proper equipment in community hospitals |  |
| □D. Patients distrusted physicians in community hospitals |  |
| □E. Difficulty in carrying out ‘two-way referral’ |  |
| □F. Others (please fill in the blank of) _________________ |  |
|  |  |

1. What do you think are the main difficulties in managing cancer comorbidity? (multiple choice)

| □A. Insufficient knowledge of cancer comorbidity and assessment methods |  |
| --- | --- |
| □B. involving multiple clinical specialties, and it is difficult to handle |  |
| □C. Patients with poor compliance |  |
| □D. Lack of relevant auxiliary professional departments (nutrition, rehabilitation, etc. ) |  |
| □E. lack of instruments and equipment in community hospitals |  |
| □F. Others (please fill in the blank of) _________________ |  |
|  |  |

1. Which of the following is your expectation on management model of cancer comorbidity?

| □A. Management by related clinical specialties of second-tier hospitals |  | |
| --- | --- | --- |
| □B. Management by general practitioner (GPs) in community hospitals |  | |
| □C. Management by general practitioner (GPs) in tertiary hospitals |  | |
| □D.Multidisciplinary comprehensive management with community-tertiary hospital general practitioners linkage |  | |
| □E. Patients self-management |  | |
| □F. Others (please fill in the blank of) _________________ |  | |
|  |  |  | |

1. Which Area in Guangzhou is your hospital located?

| | ○A. Yuexiu | | --- | | ○B. Haizhu | | ○C. Liwan | | ○D. Panyu | | ○E. Tianhe | | ○F. Luogang | | ○G. Huangpu | | ○H. Zengcheng | | ○I. Conghua | | ○J. Huadu | | ○K. Nansha | |  |
| --- | --- | --- | --- | --- | --- | --- | --- | --- | --- | --- | --- | --- |
|  |  |
|  |  |
|  |  |
|  |  |
|  |  |
