# Supplementary material
Source: Research Square preprint supplement (doi:10.21203/rs.3.rs-9538201/v1)
Supplement: Supplementary file 2 [file a465605a84bebee4f9c17680.docx]

Supplementary document 1:

Some relevant instructions and definitions included in this article:

1. All community hospitals involved in this study were located in the major administrative districts of Guangzhou city, including Yuexiu District, Tianhe District, Haizhu District, Liwan District, Huangpu District, Huadu District, Nansha District and Conghua District.

2. Chronic Disease: A chronic disease is defined as a non-communicable disease that is slowly developing, long lasting, incurable, progressive and/or life-limiting.

3. Cancer Comorbidity: Cancer comorbidity means that one or more chronic diseases in addition to cancer for cancer patients.

4. Comorbidity Assessment Tools: The commonly tools used to assess cancer comorbidity include Charlson Comorbidity Index (CCI), Elixhauser Comorbidity Index, Geriatric Index of Comorbidity (GIC), Comprehensive Geriatric Assessment (CGA), etc.

5.Multi-Disciplinary Treatment (MDT): MDT refers to a group of doctors of different specialists, each of whom can independently make decisions on the diagnosis and treatment of patients, make collective decisions on patients’ diagnosis and treatment by contacting with each other at a specific time through face-to-face or telephone conference mode.
